# Supplementary material for: Catalytic Effect of CO2 and H2O Molecules on •CH3 + 3O2 Reaction
Source: MDPI journal article supplement (doi:10.3390/catal12070699), 2022-06-25
Supplement: s1 [file s1]

# Catalytic Effect of CO<sub>2</sub> and H<sub>2</sub>O Molecules on $\cdot\text{CH}_3 + {}^3\text{O}_2$ Reaction

Mohamad Akbar Ali <sup>1,\*</sup>, Manas Ranjan Dash <sup>2</sup> and Latifah Mohammed Al Maieli <sup>1</sup>

<sup>1</sup> Department of Chemistry, College of Science, King Faisal University, Al-Ahsa 31982, Saudi Arabia; almaielilatifah@gmail.com

<sup>2</sup> Department of Chemistry, DIT University, Uttarakhand 248009, India; manas.iitm@gmail.com

\* Correspondence: aamohamad@kfu.edu.sa

**Abstract:** The methyl ( $\cdot\text{CH}_3$ ) +  ${}^3\text{O}_2$  radical is an important reaction in both atmospheric and combustion processes. We investigated potential energy surfaces for the effect of CO<sub>2</sub> and H<sub>2</sub>O molecules on a  $\cdot\text{CH}_3 + \text{O}_2$  system. The mechanism for three reaction systems, i.e., for  $\cdot\text{CH}_3 + {}^3\text{O}_2$ ,  $\cdot\text{CH}_3 + {}^3\text{O}_2$  (+CO<sub>2</sub>) and  $\cdot\text{CH}_3 + {}^3\text{O}_2$  (+H<sub>2</sub>O), were explored using *ab initio*/DFT methods [CCSD(T)//M062X/6-311++G(3df,3pd)] in combination with a Rice–Ramsperger–Kassel–Marcus (RRKM)/master-equation (ME) simulation between a temperature range of 500 to 1500 K and a pressure range of 0.0001 to 10 atm. When a CO<sub>2</sub> and H<sub>2</sub>O molecule is introduced in a  $\cdot\text{CH}_3 + {}^3\text{O}_2$  reaction, the reactive complexes, intermediates, transition states and post complexes become thermodynamically more favorable. The calculated rate constant for the  $\cdot\text{CH}_3 + {}^3\text{O}_2$  ( $3 \times 10^{-15} \text{ cm}^3 \text{ molecule}^{-1} \text{ s}^{-1}$  at 1000 K) is in good agreement with the previously reported experimentally measured values ( $\sim 1 \times 10^{-15} \text{ cm}^3 \text{ molecule}^{-1} \text{ s}^{-1}$  at 1000 K). The rate constant for the effect of CO<sub>2</sub> ( $3 \times 10^{-16} \text{ cm}^3 \text{ molecule}^{-1} \text{ s}^{-1}$  at 1000 K) and H<sub>2</sub>O ( $2 \times 10^{-17} \text{ cm}^3 \text{ molecule}^{-1} \text{ s}^{-1}$  at 1000 K) is at least one–two-order magnitude smaller than the free reaction ( $3 \times 10^{-15} \text{ cm}^3 \text{ molecule}^{-1} \text{ s}^{-1}$  at 1000 K). The effect of CO<sub>2</sub> and H<sub>2</sub>O on  $\cdot\text{CH}_3 + {}^3\text{O}_2$  shows non-RRKM behavior, however, the effect on  $\cdot\text{CH}_3 + {}^3\text{O}_2$  shows RRKM behavior. Our results also demonstrate that a single CO<sub>2</sub> and H<sub>2</sub>O molecule has the potential to accelerate a gas-phase reaction at temperature higher than >1300 K and slow the reaction at a lower temperature. The result is unique and observed for the first time.

**Keywords:**  $\cdot\text{CH}_3$  radical;  ${}^3\text{O}_2$  radical; water and CO<sub>2</sub> catalysis; *ab initio*/DFT; RRKM/ME

**Table S1.** Redundant internal coordinates of reactants, complexes, products and transition states obtained using M06-2X/6-311++G(3df,3pd) taken from gaussian checkpoint file.

| (a) CH <sub>3</sub> + O <sub>2</sub> ==> CH <sub>2</sub> O + HO                                          |                                                               |                                                                                                                                                                                                                                                                                                                                        |                                                                                                                                                                                                                                                                                                                                  |                                                                                                                                                                                                                                                                                                                                 |                                                                                                                                                                                                                                                                      |                                                                                                                                                                                                                                                                                                                                                                                              |                                                                                                                                                                                                                                                                                                                                                                                                     |                                                                                                                                                                                                                                                                                                                                                                                                |
|----------------------------------------------------------------------------------------------------------|---------------------------------------------------------------|----------------------------------------------------------------------------------------------------------------------------------------------------------------------------------------------------------------------------------------------------------------------------------------------------------------------------------------|----------------------------------------------------------------------------------------------------------------------------------------------------------------------------------------------------------------------------------------------------------------------------------------------------------------------------------|---------------------------------------------------------------------------------------------------------------------------------------------------------------------------------------------------------------------------------------------------------------------------------------------------------------------------------|----------------------------------------------------------------------------------------------------------------------------------------------------------------------------------------------------------------------------------------------------------------------|----------------------------------------------------------------------------------------------------------------------------------------------------------------------------------------------------------------------------------------------------------------------------------------------------------------------------------------------------------------------------------------------|-----------------------------------------------------------------------------------------------------------------------------------------------------------------------------------------------------------------------------------------------------------------------------------------------------------------------------------------------------------------------------------------------------|------------------------------------------------------------------------------------------------------------------------------------------------------------------------------------------------------------------------------------------------------------------------------------------------------------------------------------------------------------------------------------------------|
| CH <sub>3</sub>                                                                                          | O <sub>2</sub>                                                | RC                                                                                                                                                                                                                                                                                                                                     | TS1                                                                                                                                                                                                                                                                                                                              | Int-1                                                                                                                                                                                                                                                                                                                           | TS2                                                                                                                                                                                                                                                                  | Int-2                                                                                                                                                                                                                                                                                                                                                                                        | TS3                                                                                                                                                                                                                                                                                                                                                                                                 | PC                                                                                                                                                                                                                                                                                                                                                                                             |
| Charge =<br>0 Multiplic-<br>ity = 2                                                                      | Charge =<br>0 Multi-<br>plicity = 3                           | Charge =<br>0<br>Multiplicity<br>= 2                                                                                                                                                                                                                                                                                                   | Charge =<br>0<br>Multiplicity<br>= 2                                                                                                                                                                                                                                                                                             | Charge =<br>0<br>Multiplicity<br>= 2                                                                                                                                                                                                                                                                                            | Charge =<br>0<br>Multiplicity<br>= 2                                                                                                                                                                                                                                 | Charge =<br>0<br>Multiplicity<br>= 2                                                                                                                                                                                                                                                                                                                                                         | Charge =<br>0<br>Multiplic-<br>ity = 2                                                                                                                                                                                                                                                                                                                                                              | Charge =<br>0<br>Multiplicity<br>= 2                                                                                                                                                                                                                                                                                                                                                           |
| C,0,0.,0.000<br>0001111,0.                                                                               | O,0,0.,0.,0.5<br>938390313<br>O,0,0.,0.,-<br>0.59383903<br>13 | C,0,1.89977<br>14092,-<br>0.066472136<br>8,0.0062984<br>681                                                                                                                                                                                                                                                                            | C,0,1.43396<br>38582,-<br>0.204606976<br>1,-<br>0.041036864<br>1                                                                                                                                                                                                                                                                 | C,0,1.08346<br>6449,-<br>0.180447232<br>2,-<br>0.000108254<br>4                                                                                                                                                                                                                                                                 | C,0,0.93885<br>90949,-<br>0.254499968<br>2,0.0000010<br>222<br>H,0,-<br>0.064670196<br>4,-<br>1.117653894<br>6,-<br>0.000008890<br>6                                                                                                                                 | 1.118275367<br>9,0.2495177<br>688,0.10092<br>69949<br>O,0,-<br>0.061659221<br>9,-<br>0.572175002<br>7,-<br>0.104347832<br>3<br>H,0,-<br>2.048259569<br>3,-<br>0.298388570<br>6,0.0873675<br>153<br>H,0,-<br>1.028952177<br>6,1.2622953<br>239,-<br>0.266287484<br>2<br>O,0,1.12859<br>15628,0.189<br>7888208,-<br>0.098638149<br>2<br>H,0,1.40243<br>97739,0.124<br>9366599,0.8<br>254409554 | 1.14591277<br>75,0.26689<br>63639,0.15<br>15185491<br>O,0,0.1140<br>577578,-<br>0.56567448<br>01,-<br>0.06913651<br>58<br>C,0,1.1500<br>525939,0.2<br>192667703,<br>-<br>0.02462498<br>7<br>H,0,-<br>1.70689488<br>91,-<br>0.13339096<br>24,-<br>0.52411213<br>22<br>H,0,1.9409<br>175785,-<br>0.03860070<br>85,0.66804<br>10743<br>H,0,1.1244<br>157364,1.1<br>542780168,<br>-<br>0.56873798<br>85 | C,0,1.57777<br>80365,0.282<br>2699021,-<br>0.001587569<br>5<br>H,0,2.64784<br>61523,0.025<br>6072139,0.0<br>282689007<br>H,0,1.30142<br>3077,1.3485<br>055912,-<br>0.023589027<br>6<br>O,0,-<br>1.319591142<br>2,1.3914153<br>616,-<br>0.082323831<br>8<br>O,0,0.73591<br>14379,-<br>0.572702514<br>,-<br>0.009945152<br>4<br>H,0,-<br>0.894074801<br>5,0.5112897<br>552,-<br>0.061304729<br>4 |
| H,0,0.,1.077<br>7366481,0.                                                                               |                                                               | 0.066472136<br>8,0.0062984<br>681                                                                                                                                                                                                                                                                                                      | 0.204606976<br>1,-<br>0.041036864<br>1                                                                                                                                                                                                                                                                                           | 0.180447232<br>2,-<br>0.000108254<br>4                                                                                                                                                                                                                                                                                          | 0.254499968<br>2,0.0000010<br>222<br>H,0,-<br>0.064670196<br>4,-<br>1.117653894<br>6,-<br>0.000008890<br>6                                                                                                                                                           | 688,0.10092<br>69949<br>O,0,-<br>0.061659221<br>9,-<br>0.572175002<br>7,-<br>0.104347832<br>3<br>H,0,-<br>2.048259569<br>3,-<br>0.298388570<br>6,0.0873675<br>153<br>H,0,-<br>1.028952177<br>6,1.2622953<br>239,-<br>0.266287484<br>2<br>O,0,1.12859<br>15628,0.189<br>7888208,-<br>0.098638149<br>2<br>H,0,1.40243<br>97739,0.124<br>9366599,0.8<br>254409554                               | 63639,0.15<br>15185491<br>O,0,0.1140<br>577578,-<br>0.56567448<br>01,-<br>0.06913651<br>58<br>C,0,1.1500<br>525939,0.2<br>192667703,<br>-<br>0.02462498<br>7<br>H,0,-<br>1.70689488<br>91,-<br>0.13339096<br>24,-<br>0.52411213<br>22<br>H,0,1.9409<br>175785,-<br>0.03860070<br>85,0.66804<br>10743<br>H,0,1.1244<br>157364,1.1<br>542780168,<br>-<br>0.56873798<br>85                             | 2699021,-<br>0.001587569<br>5<br>H,0,2.64784<br>61523,0.025<br>6072139,0.0<br>282689007<br>H,0,1.30142<br>3077,1.3485<br>055912,-<br>0.023589027<br>6<br>O,0,-<br>1.319591142<br>2,1.3914153<br>616,-<br>0.082323831<br>8<br>O,0,0.73591<br>14379,-<br>0.572702514<br>,-<br>0.009945152<br>4<br>H,0,-<br>0.894074801<br>5,0.5112897<br>552,-<br>0.061304729<br>4                               |
| H,0,0.93334<br>72196,-<br>0.538868157<br>4,0.<br>H,0,-<br>0.933347219<br>6,-<br>0.538868157<br>4,0.      |                                                               | H,0,2.85065<br>84729,0.428<br>5997927,-<br>0.106729961<br>3<br>H,0,1.46189<br>40515,-<br>0.179038467<br>6,0.9847565<br>221<br>H,0,1.42999<br>04275,-<br>0.534728805<br>5,-<br>0.843081135<br>9<br>O,0,-<br>1.196362315<br>9,-<br>0.534021670<br>5,0.0181992<br>062<br>O,0,-<br>0.934033045<br>2,0.6235922<br>877,-<br>0.031720099<br>2 | H,0,1.22142<br>13268,-<br>0.859057023<br>7,-<br>0.869575347<br>6<br>H,0,1.98309<br>81651,0.703<br>6117787,-<br>0.225334869<br>7<br>H,0,1.42633<br>02762,-<br>0.613203815<br>2,0.9553642<br>996<br>O,0,-<br>1.448780223<br>,-<br>0.223233346<br>4,0.0680200<br>964<br>O,0,-<br>0.596625403<br>4,0.6278073<br>826,0.05549<br>66854 | H,0,1.86568<br>7945,0.5739<br>675178,-<br>0.001363984<br>5<br>H,0,1.12899<br>55479,-<br>0.798440088<br>5,-<br>0.894701196<br>4<br>H,0,1.12995<br>48664,-<br>0.796439147<br>0.89582239<br>44<br>O,0,-<br>0.158612522<br>3,0.5374362<br>06,-<br>0.000246285<br>6<br>O,0,-<br>1.163903286<br>,-<br>0.275924256<br>0.00041832<br>65 | H,0,1.47522<br>22341,-<br>0.371242254<br>0.93846064<br>3<br>H,0,1.47522<br>92384,-<br>0.371228082<br>3,-<br>0.938456372<br>3<br>O,0,-<br>0.022663454<br>3,0.7318364<br>354,0.00000<br>48771<br>O,0,-<br>1.043283916<br>7,-<br>0.307583236<br>3,-<br>0.000005199<br>4 | 1.118275367<br>9,0.2495177<br>688,0.10092<br>69949<br>O,0,-<br>0.061659221<br>9,-<br>0.572175002<br>7,-<br>0.104347832<br>3<br>H,0,-<br>2.048259569<br>3,-<br>0.298388570<br>6,0.0873675<br>153<br>H,0,-<br>1.028952177<br>6,1.2622953<br>239,-<br>0.266287484<br>2<br>O,0,1.12859<br>15628,0.189<br>7888208,-<br>0.098638149<br>2<br>H,0,1.40243<br>97739,0.124<br>9366599,0.8<br>254409554 | 1.14591277<br>75,0.26689<br>63639,0.15<br>15185491<br>O,0,0.1140<br>577578,-<br>0.56567448<br>01,-<br>0.06913651<br>58<br>C,0,1.1500<br>525939,0.2<br>192667703,<br>-<br>0.02462498<br>7<br>H,0,-<br>1.70689488<br>91,-<br>0.13339096<br>24,-<br>0.52411213<br>22<br>H,0,1.9409<br>175785,-<br>0.03860070<br>85,0.66804<br>10743<br>H,0,1.1244<br>157364,1.1<br>542780168,<br>-<br>0.56873798<br>85 | C,0,1.57777<br>80365,0.282<br>2699021,-<br>0.001587569<br>5<br>H,0,2.64784<br>61523,0.025<br>6072139,0.0<br>282689007<br>H,0,1.30142<br>3077,1.3485<br>055912,-<br>0.023589027<br>6<br>O,0,-<br>1.319591142<br>2,1.3914153<br>616,-<br>0.082323831<br>8<br>O,0,0.73591<br>14379,-<br>0.572702514<br>,-<br>0.009945152<br>4<br>H,0,-<br>0.894074801<br>5,0.5112897<br>552,-<br>0.061304729<br>4 |
| (b) CH <sub>3</sub> + O <sub>2</sub> (+CO <sub>2</sub> ) ==> CH <sub>2</sub> O + HO + (CO <sub>2</sub> ) |                                                               |                                                                                                                                                                                                                                                                                                                                        |                                                                                                                                                                                                                                                                                                                                  |                                                                                                                                                                                                                                                                                                                                 |                                                                                                                                                                                                                                                                      |                                                                                                                                                                                                                                                                                                                                                                                              |                                                                                                                                                                                                                                                                                                                                                                                                     |                                                                                                                                                                                                                                                                                                                                                                                                |
| RC-c                                                                                                     | TS-1c                                                         | Int-1c                                                                                                                                                                                                                                                                                                                                 | TS2-c                                                                                                                                                                                                                                                                                                                            | Int-2c                                                                                                                                                                                                                                                                                                                          | TS3-c                                                                                                                                                                                                                                                                | PC-c                                                                                                                                                                                                                                                                                                                                                                                         |                                                                                                                                                                                                                                                                                                                                                                                                     |                                                                                                                                                                                                                                                                                                                                                                                                |
| Redundant<br>internal<br>coordinates                                                                     | Charge =<br>0                                                 | Charge =<br>0 Multiplic-<br>ity = 2                                                                                                                                                                                                                                                                                                    | Charge =<br>0 Multiplic-<br>ity = 2                                                                                                                                                                                                                                                                                              | Charge =<br>0                                                                                                                                                                                                                                                                                                                   | Charge =<br>0 Multiplic-<br>ity = 2                                                                                                                                                                                                                                  | Charge = 0 Multiplicity = 2<br>Redundant internal coordinates found<br>in file.                                                                                                                                                                                                                                                                                                              |                                                                                                                                                                                                                                                                                                                                                                                                     |                                                                                                                                                                                                                                                                                                                                                                                                |

|                                                                                                                                                                                                                                                                                                                                                                                                                                                                                                                                                                                                                              |                                                                                                                                                                                                                                                                                                                                                                                                                                                                                                                                                                                                                                                          |                                                                                                                                                                                                                                                                                                                                                                                                                                                                                                                                                                                               |                                                                                                                                                                                                                                                                                                                                                                                                                                                                                                                                                                                                                 |                                                                                                                                                                                                                                                                                                                                                                                                                                                                                                                                                                                                                          |                                                                                                                                                                                                                                                                                                                                                                                                                                                                                                                                                                                                                                                    |                                                                                                                                                                                                                                                                                                                                                                                                                                                                             |
|------------------------------------------------------------------------------------------------------------------------------------------------------------------------------------------------------------------------------------------------------------------------------------------------------------------------------------------------------------------------------------------------------------------------------------------------------------------------------------------------------------------------------------------------------------------------------------------------------------------------------|----------------------------------------------------------------------------------------------------------------------------------------------------------------------------------------------------------------------------------------------------------------------------------------------------------------------------------------------------------------------------------------------------------------------------------------------------------------------------------------------------------------------------------------------------------------------------------------------------------------------------------------------------------|-----------------------------------------------------------------------------------------------------------------------------------------------------------------------------------------------------------------------------------------------------------------------------------------------------------------------------------------------------------------------------------------------------------------------------------------------------------------------------------------------------------------------------------------------------------------------------------------------|-----------------------------------------------------------------------------------------------------------------------------------------------------------------------------------------------------------------------------------------------------------------------------------------------------------------------------------------------------------------------------------------------------------------------------------------------------------------------------------------------------------------------------------------------------------------------------------------------------------------|--------------------------------------------------------------------------------------------------------------------------------------------------------------------------------------------------------------------------------------------------------------------------------------------------------------------------------------------------------------------------------------------------------------------------------------------------------------------------------------------------------------------------------------------------------------------------------------------------------------------------|----------------------------------------------------------------------------------------------------------------------------------------------------------------------------------------------------------------------------------------------------------------------------------------------------------------------------------------------------------------------------------------------------------------------------------------------------------------------------------------------------------------------------------------------------------------------------------------------------------------------------------------------------|-----------------------------------------------------------------------------------------------------------------------------------------------------------------------------------------------------------------------------------------------------------------------------------------------------------------------------------------------------------------------------------------------------------------------------------------------------------------------------|
| found in<br>file.<br>C,0,-<br>0.403090903<br>2,2.1732845<br>739,-<br>0.039004478<br>H,0,-<br>1.033316849<br>5,1.8447244<br>599,-<br>0.847934667<br>6<br>H,0,0.50949<br>72709,2.702<br>5562777,-<br>0.256707599<br>4<br>H,0,-<br>0.764925361<br>1,2.1310466<br>408,0.97390<br>71184<br>O,0,-<br>2.053520643<br>6,-<br>0.898983533<br>5,-<br>0.293291493<br>O,0,-<br>1.345426574<br>9,-<br>0.655631704<br>8,0.6289091<br>873<br>O,0,1.74166<br>44438,-<br>0.115754946<br>9,0.9595284<br>092<br>C,0,1.40808<br>98453,-<br>0.307337627<br>3,-<br>0.128229577<br>O,0,1.08629<br>37724,-<br>0.510644139<br>8,-<br>1.218102899<br>8 | Multiplicit<br>y = 2<br>Redundant<br>internal<br>coordinate<br>s found in<br>file.<br>C,0,-<br>2.18757416<br>35,1.111516<br>921,-<br>0.11279309<br>15<br>H,0,-<br>3.24313279<br>32,0.908076<br>2668,-<br>0.18019295<br>81<br>H,0,-<br>1.68848850<br>65,1.587249<br>2361,-<br>0.93964384<br>74<br>H,0,-<br>1.72767241<br>97,1.160195<br>513,0.86020<br>16983<br>O,0,-<br>1.49923736<br>9,-<br>0.97506453<br>77,-<br>0.53223066<br>12<br>O,0,-<br>0.54845292<br>29,-<br>1.32159400<br>59,0.119404<br>0508<br>O,0,0.97203<br>02583,1.186<br>5989513,-<br>0.38349344<br>49<br>C,0,1.67914<br>7191,0.3711<br>023634,0.02<br>7917306<br>O,0,2.39607<br>47255,- | C,0,1.89724<br>99291,0.867<br>3673169,0.0<br>003322581<br>H,0,2.92755<br>40525,1.211<br>9081956,0.0<br>004787045<br>H,0,1.36544<br>31143,1.191<br>2976433,0.8<br>922755081<br>H,0,1.36520<br>10269,1.192<br>6737843,-<br>0.890956510<br>6<br>O,0,1.96841<br>08625,-<br>0.567093369<br>9,-<br>0.000791527<br>5<br>O,0,0.79168<br>78482,-<br>1.100220545<br>1,-<br>0.000739896<br>4<br>O,0,-<br>1.140864063<br>1,1.2541227<br>984,-<br>0.001995216<br>2<br>C,0,-<br>1.631824767<br>7,0.2070525<br>461,-<br>0.000073120<br>3<br>O,0,-<br>2.149945002<br>7,-<br>0.821434369<br>7,0.0018638<br>002 | C,0,-<br>1.821863996<br>9,0.6102913<br>195,-<br>0.193757727<br>6<br>H,0,-<br>1.583865675<br>1,0.1672093<br>957,1.03056<br>90043<br>H,0,-<br>2.891808084<br>2,0.5359797<br>015,-<br>0.369119021<br>8<br>H,0,-<br>1.317235815<br>,1.56756516<br>73,-<br>0.291540875<br>7<br>O,0,-<br>1.090426801<br>2,-<br>0.474518635<br>3,-<br>0.634087993<br>8<br>O,0,-<br>0.921329492<br>8,-<br>0.884697738<br>4,0.7552183<br>638<br>O,0,1.08787<br>11434,1.279<br>9329222,0.2<br>120133097<br>C,0,1.49123<br>8922,0.2198<br>283069,-<br>0.015660184<br>3<br>O,0,1.92249<br>27998,-<br>0.823149439<br>4,-<br>0.242341874<br>6 | Multiplicity<br>= 2<br>C,0,-<br>1.088745861<br>8,1.1574292<br>376,0.54208<br>65617<br>O,0,-<br>1.145686627<br>2,0.3542998<br>278,-<br>0.548139739<br>O,0,-<br>1.751710890<br>6,-<br>0.871169485<br>1,-<br>0.195224747<br>2<br>C,0,1.50339<br>62303,-<br>0.196138694<br>6,0.0287415<br>513<br>O,0,1.93196<br>17688,0.820<br>6219602,-<br>0.296615253<br>8<br>O,0,1.09580<br>19026,-<br>1.228845913<br>7,0.3576874<br>373<br>H,0,-<br>0.985643768<br>2,-<br>1.393561411<br>9,0.0852516<br>491<br>H,0,-<br>0.650188154<br>1,2.1147658<br>58,0.303790<br>1544<br>H,0,-<br>1.857373599<br>9,1.0249206<br>217,1.28944<br>23862 | Redun-<br>dant inter-<br>nal coordi-<br>nates found<br>in file.<br>C,0,1.97474<br>06962,-<br>1.018170174<br>7,0.1950561<br>68<br>O,0,1.01625<br>94944,-<br>0.261693452<br>5,-<br>0.239177259<br>1<br>O,0,1.48693<br>66434,1.205<br>982271,-<br>0.243844578<br>5<br>C,0,-<br>1.672365743<br>5,-<br>0.027729563<br>8,0.0684029<br>918<br>O,0,-<br>1.911543386<br>2,-<br>1.140325518<br>7,-<br>0.101479072<br>8<br>O,0,-<br>1.460913075<br>8,1.0961900<br>654,0.24553<br>05054<br>H,0,0.65430<br>41902,1.616<br>6283116,0.0<br>286598833<br>H,0,2.29021<br>78716,-<br>1.838963724<br>1,-<br>0.435185292<br>1<br>H,0,2.50770<br>63096,-<br>0.731575214 | C,0,-1.9136499046,-<br>1.2889220091,0.0434040673<br>O,0,-0.7884085292,-0.9502256698,-<br>0.1923419416<br>O,0,-<br>1.7958978164,1.602610716,0.0063607139<br>C,0,1.6847928571,0.1520348181,0.024231<br>3927<br>O,0,2.1763938999,-<br>0.8620026965,0.2528363251<br>O,0,1.2220663057,1.1887000368,-<br>0.2018108232<br>H,0,-0.8335671716,1.4705206777,-<br>0.0600651658<br>H,0,-2.3247115401,-2.2243122859,-<br>0.366464402<br>H,0,-2.5763443219,-<br>0.6788132984,0.6745011392 |
|------------------------------------------------------------------------------------------------------------------------------------------------------------------------------------------------------------------------------------------------------------------------------------------------------------------------------------------------------------------------------------------------------------------------------------------------------------------------------------------------------------------------------------------------------------------------------------------------------------------------------|----------------------------------------------------------------------------------------------------------------------------------------------------------------------------------------------------------------------------------------------------------------------------------------------------------------------------------------------------------------------------------------------------------------------------------------------------------------------------------------------------------------------------------------------------------------------------------------------------------------------------------------------------------|-----------------------------------------------------------------------------------------------------------------------------------------------------------------------------------------------------------------------------------------------------------------------------------------------------------------------------------------------------------------------------------------------------------------------------------------------------------------------------------------------------------------------------------------------------------------------------------------------|-----------------------------------------------------------------------------------------------------------------------------------------------------------------------------------------------------------------------------------------------------------------------------------------------------------------------------------------------------------------------------------------------------------------------------------------------------------------------------------------------------------------------------------------------------------------------------------------------------------------|--------------------------------------------------------------------------------------------------------------------------------------------------------------------------------------------------------------------------------------------------------------------------------------------------------------------------------------------------------------------------------------------------------------------------------------------------------------------------------------------------------------------------------------------------------------------------------------------------------------------------|----------------------------------------------------------------------------------------------------------------------------------------------------------------------------------------------------------------------------------------------------------------------------------------------------------------------------------------------------------------------------------------------------------------------------------------------------------------------------------------------------------------------------------------------------------------------------------------------------------------------------------------------------|-----------------------------------------------------------------------------------------------------------------------------------------------------------------------------------------------------------------------------------------------------------------------------------------------------------------------------------------------------------------------------------------------------------------------------------------------------------------------------|

|                                                                                                                                                                                                                                                                                                                                                                                                                                                                                                                                                    | 0.43257270<br>8,0.4383049<br>48                                                                                                                                                                                                                                                                                                                                                                                                                                                                                                                            |                                                                                                                                                                                                                                                                                                                                                                                                                                                                                                                                                                     |                                                                                                                                                                                                                                                                                                                                                                                                                                                                                                                   |                                                                                                                                                                                                                                                                                                                                                                                                                                                                                                                                                             | 2,1.0914506<br>54                                                                                                                                                                                                                                                                                                                                                                                                                                                                                                              |                                                                                                                                                                                                                                                                                                                                                                                                                                                                                                             |
|----------------------------------------------------------------------------------------------------------------------------------------------------------------------------------------------------------------------------------------------------------------------------------------------------------------------------------------------------------------------------------------------------------------------------------------------------------------------------------------------------------------------------------------------------|------------------------------------------------------------------------------------------------------------------------------------------------------------------------------------------------------------------------------------------------------------------------------------------------------------------------------------------------------------------------------------------------------------------------------------------------------------------------------------------------------------------------------------------------------------|---------------------------------------------------------------------------------------------------------------------------------------------------------------------------------------------------------------------------------------------------------------------------------------------------------------------------------------------------------------------------------------------------------------------------------------------------------------------------------------------------------------------------------------------------------------------|-------------------------------------------------------------------------------------------------------------------------------------------------------------------------------------------------------------------------------------------------------------------------------------------------------------------------------------------------------------------------------------------------------------------------------------------------------------------------------------------------------------------|-------------------------------------------------------------------------------------------------------------------------------------------------------------------------------------------------------------------------------------------------------------------------------------------------------------------------------------------------------------------------------------------------------------------------------------------------------------------------------------------------------------------------------------------------------------|--------------------------------------------------------------------------------------------------------------------------------------------------------------------------------------------------------------------------------------------------------------------------------------------------------------------------------------------------------------------------------------------------------------------------------------------------------------------------------------------------------------------------------|-------------------------------------------------------------------------------------------------------------------------------------------------------------------------------------------------------------------------------------------------------------------------------------------------------------------------------------------------------------------------------------------------------------------------------------------------------------------------------------------------------------|
| (c) CH <sub>3</sub> + O <sub>2</sub> (+H <sub>2</sub> O) ==> CH <sub>2</sub> O + HO + (H <sub>2</sub> O)                                                                                                                                                                                                                                                                                                                                                                                                                                           |                                                                                                                                                                                                                                                                                                                                                                                                                                                                                                                                                            |                                                                                                                                                                                                                                                                                                                                                                                                                                                                                                                                                                     |                                                                                                                                                                                                                                                                                                                                                                                                                                                                                                                   |                                                                                                                                                                                                                                                                                                                                                                                                                                                                                                                                                             |                                                                                                                                                                                                                                                                                                                                                                                                                                                                                                                                |                                                                                                                                                                                                                                                                                                                                                                                                                                                                                                             |
| RC-h                                                                                                                                                                                                                                                                                                                                                                                                                                                                                                                                               | TS1-h                                                                                                                                                                                                                                                                                                                                                                                                                                                                                                                                                      | Int-1h                                                                                                                                                                                                                                                                                                                                                                                                                                                                                                                                                              | TS2-h                                                                                                                                                                                                                                                                                                                                                                                                                                                                                                             | Int-2h                                                                                                                                                                                                                                                                                                                                                                                                                                                                                                                                                      | TS3-h                                                                                                                                                                                                                                                                                                                                                                                                                                                                                                                          | PC-h                                                                                                                                                                                                                                                                                                                                                                                                                                                                                                        |
| Charge =<br>0<br>Multiplicity<br>= 2<br>C,0,-<br>2.963651346<br>4,-<br>0.383513479<br>6,0.0666842<br>607<br>H,0,-<br>2.844620190<br>1,-<br>0.008445291<br>4,1.0703247<br>H,0,-<br>3.040900352<br>8,-<br>1.444490263<br>4,-<br>0.106457842<br>7<br>H,0,-<br>3.071917365<br>9,0.3059045<br>698,-<br>0.754674328<br>4<br>O,0,-<br>0.212102531<br>2,-<br>0.083067885<br>6,-<br>0.216687471<br>7<br>O,0,0.07095<br>24791,1.028<br>5247424,0.0<br>974197551<br>O,0,2.85630<br>03458,-<br>0.437687968<br>7,0.0193938<br>134<br>H,0,2.49225<br>48209,0.445 | Charge =<br>0<br>Multiplic<br>y = 2<br>Redundant<br>internal<br>coordinate<br>s found in<br>file.<br>C,0,-<br>2.15840728<br>57,1.089089<br>2868,0.1434<br>12266<br>H,0,-<br>2.98357888<br>12,0.556833<br>7124,0.5868<br>219063<br>H,0,-<br>2.32102532<br>46,1.588798<br>0037,-<br>0.79696258<br>29<br>H,0,-<br>1.32628971<br>22,1.377955<br>3428,0.7633<br>617593<br>O,0,-<br>1.13819598<br>71,-<br>0.77121732<br>85,-<br>0.62317454<br>41<br>O,0,-<br>0.88234905<br>35,-<br>1.56011364<br>09,0.249469<br>1609<br>O,0,-<br>3.73517712<br>1,-<br>0.21768732 | Charge =<br>0<br>Multiplicity<br>= 2<br>C,0,1.98978<br>9814,0.7875<br>366116,-<br>0.081157475<br>3<br>H,0,3.05043<br>02885,0.962<br>8979976,-<br>0.234411247<br>H,0,1.62692<br>5035,1.2549<br>502159,0.83<br>18943371<br>H,0,1.39445<br>98435,1.123<br>3628274,-<br>0.927674082<br>O,0,1.84997<br>40534,-<br>0.640320379<br>7,0.0440870<br>018<br>O,0,0.62115<br>65482,-<br>0.987321383<br>2,0.2324612<br>046<br>O,0,-<br>0.853909349<br>8,1.5141204<br>285,0.23735<br>04368<br>H,0,-<br>0.580785200<br>7,0.5888125<br>413,0.27181<br>50823<br>H,0,-<br>1.803676031 | Charge =<br>0<br>Multiplicity<br>= 2<br>C,0,0.86839<br>96768,0.916<br>0541372,-<br>0.297405945<br>7<br>H,0,0.82705<br>86272,-<br>0.117582258<br>6,-<br>1.122886798<br>7<br>H,0,1.84964<br>26871,1.375<br>0771343,-<br>0.383394712<br>3<br>H,0,-<br>0.036975971<br>6,1.4852749<br>183,-<br>0.491194025<br>2<br>O,0,0.75360<br>02182,-<br>0.007413880<br>8,0.7243472<br>696<br>O,0,0.69072<br>88555,-<br>1.064120371<br>7,-<br>0.277075983<br>5<br>O,0,-<br>2.019627810<br>9,0.0784147<br>994,-<br>0.050269244<br>3 | Charge =<br>0<br>Multiplicity<br>= 2<br>C,0,-<br>1.204644425<br>2,1.3464885<br>854,0.42781<br>12487<br>O,0,-<br>1.383458305<br>2,0.4214636<br>796,-<br>0.536826062<br>2<br>O,0,-<br>1.370078089<br>3,-<br>0.870322759<br>2,0.0330891<br>711<br>H,0,-<br>0.408156635<br>,-<br>1.039714900<br>8,0.0737981<br>063<br>H,0,-<br>1.295884361<br>8,2.3506376<br>926,0.04003<br>68336<br>H,0,-<br>1.517547498<br>3,1.0784058<br>796,1.42763<br>64445<br>O,0,1.34318<br>02731,-<br>0.415703404<br>5,0.0995154<br>707<br>H,0,1.62045<br>37091,-<br>0.291673324<br>7,- | Charge =<br>0<br>Multiplicity<br>= 2<br>C,0,1.82315<br>43739,-<br>0.965038976<br>1,0.1093036<br>112<br>O,0,0.98866<br>89498,-<br>0.267409878<br>3,-<br>0.588526944<br>9<br>O,0,1.29414<br>23622,1.247<br>1427378,-<br>0.378473175<br>5<br>H,0,0.39201<br>3057,1.5225<br>281222,-<br>0.138081711<br>4<br>H,0,2.45226<br>74208,-<br>1.676558097<br>2,-<br>0.413478656<br>7<br>H,0,1.97055<br>69916,-<br>0.720362967<br>6,1.1543839<br>736<br>O,0,-<br>1.477056109<br>5,1.0348928<br>162,0.02463<br>92083<br>H,0,-<br>1.179911592 | Charge = 0 Multiplicity = 2<br>C,0,-1.6122629331,-1.3436095392,-<br>0.084820079<br>O,0,-0.5210833955,-1.7446048934,-<br>0.3934505332<br>O,0,-<br>1.2972870327,1.981907949,0.4491861397<br>H,0,-<br>0.4053931507,1.5682205643,0.3794271931<br>H,0,-2.4877381609,-2.0091141187,-<br>0.1377457547<br>H,0,-1.7694562693,-<br>0.3081356201,0.2539383693<br>O,0,1.0008741071,0.5056466964,0.182075<br>1427<br>H,0,1.7096625242,0.7367278558,-<br>0.4195391864<br>H,0,0.6725663109,-0.3650698941,-<br>0.0952382916 |

|                                                                 |                                                                                                                                                |                                     |                                                                                                                                      |                                                                            |                                                                                                              |  |
|-----------------------------------------------------------------|------------------------------------------------------------------------------------------------------------------------------------------------|-------------------------------------|--------------------------------------------------------------------------------------------------------------------------------------|----------------------------------------------------------------------------|--------------------------------------------------------------------------------------------------------------|--|
| 4042496,0.1<br>03558306                                         | 07,-<br>2.16040097<br>53                                                                                                                       | 9,1.5133581<br>406,0.36477<br>67418 | H,0,-<br>1.459292747<br>9,-<br>0.641686663<br>9,-<br>0.355607889<br>2<br>H,0,-<br>1.720179534<br>4,0.2119361<br>858,0.85227<br>53293 | 0.811321376<br>8<br>H,0,1.05973<br>63328,0.458<br>7305521,0.3<br>947391642 | 6,0.1697894<br>282,-<br>0.276300924<br>4<br>H,0,-<br>2.046191453<br>1,1.3680348<br>147,-<br>0.671712380<br>2 |  |
| H,0,2.09732<br>71408,-<br>1.000170673<br>,-<br>0.144596192<br>5 | H,0,-<br>2.94279206<br>92,-<br>0.67084493<br>02,-<br>1.86144981<br>44<br>H,0,-<br>4.06674756<br>57,-<br>0.74149612<br>54,-<br>2.89163417<br>57 |                                     |                                                                                                                                      |                                                                            |                                                                                                              |  |

**Table S2.** Rotational -vibrational parameters obtained from vibrational analysis.

|             | Int-1       | Int-2       | TS2         | TS3              | PC          | RC       | TS1      |
|-------------|-------------|-------------|-------------|------------------|-------------|----------|----------|
|             | 146.53      | 213.15      | -1852.31    | -540.95          | 159.5       | 68.69    | -335.06  |
|             | 523.15      | 323.73      | 273.88      | 253.54           | 216.51      | 131.16   | 78.2     |
|             | 978.2       | 519.98      | 777.59      | 432.04           | 221.23      | 141.98   | 225.5    |
|             | 1151.17     | 706.47      | 913.57      | 481.86           | 443.92      | 227      | 486.76   |
|             | 1204.56     | 962.11      | 1046.05     | 638.91           | 595.72      | 327.61   | 506.26   |
|             | 1311.29     | 1190.62     | 1114.31     | 1172.8           | 1230.77     | 517.35   | 797.08   |
|             | 1462.75     | 1233.29     | 1154.6      | 1196.02          | 1289.01     | 1417.06  | 1421.23  |
|             | 1474.73     | 1423.45     | 1180.84     | 1296.6           | 1539.28     | 1421.94  | 1422.54  |
|             | 1485.2      | 1456.33     | 1467.94     | 1490.13          | 1851.53     | 1765.77  | 1586.67  |
|             | 3050.05     | 3151.17     | 2017.66     | 3116.27          | 2995.26     | 3120.34  | 3122.15  |
|             | 3160.59     | 3294.63     | 3078.21     | 3253.22          | 3087.37     | 3302.3   | 3297.67  |
|             | 3161.14     | 3818.26     | 3203.36     | 3852.9           | 3671.35     | 3309.78  | 3301.61  |
| D1          | 53.65327    | 54.40369    | 36.00364    | 52.97019         | 40.59308    | 38.69067 | 48.3499  |
| 2D1         | 11.60987    | 11.54995    | 14.84479    | 10.85359         | 5.47897     | 5.39689  | 7.11037  |
| 2D2         | 10.16483    | 9.91932     | 11.349      | 9.47676          | 4.8274      | 4.89403  | 6.47351  |
| 2D          | 10.86335    | 10.70363    | 12.97974    | 10.14184         | 5.142877    | 5.139313 | 6.784471 |
| with<br>CO2 |             |             |             |                  |             |          |          |
| RC-c        | Int-1-<br>c | Int-2-<br>c | TS1-c       | TS2-c            | TS3-c       | PC-c     |          |
| 27.95       | 12.79       | 75.03       | -<br>291.63 | -<br>1844.6<br>2 | -<br>627.36 | 25.51    |          |
| 52.82       | 83.03       | 110.7       | 15.11       | 72.36            | 42.88       | 45.08    |          |
| 71.61       | 107.98      | 146.48      | 66.4        | 117.1            | 64.36       | 94.2     |          |
| 99.95       | 125.31      | 173.98      | 78.29       | 142.98           | 97.94       | 108.99   |          |
| 111.57      | 134.58      | 199.5       | 89.1        | 168.93           | 133.03      | 121.98   |          |
| 127.25      | 151.76      | 315.53      | 111.47      | 176              | 155.77      | 128.46   |          |
| 150.06      | 526.43      | 399.25      | 119.84      | 316.72           | 365.34      | 172.15   |          |
| 179.66      | 687.58      | 525.46      | 232.53      | 696.08           | 442.71      | 175.47   |          |
| 202.4       | 702.13      | 691.09      | 427.18      | 698.43           | 478.82      | 364.7    |          |
| 250.59      | 975.5       | 696.02      | 475.84      | 777.55           | 687.11      | 411.41   |          |

|             |             |              |              |              |              |              |              |
|-------------|-------------|--------------|--------------|--------------|--------------|--------------|--------------|
| 531.08      | 1154.2<br>3 | 701.67       | 694.95       | 910.21       | 694.92       | 698.69       |              |
|             | 686.37      | 1200.5<br>5  | 970.51       | 702.63       | 1042.8<br>5  | 700.58       | 703.03       |
|             | 697.88      | 1322.5<br>1  | 1196.7       | 794.26       | 1113.6<br>7  | 1186.3<br>1  | 1229.3<br>4  |
|             | 1414.5<br>5 | 1417.0<br>3  | 1236.3<br>2  | 1416.8<br>2  | 1147.1<br>1  | 1207.2<br>7  | 1289.9<br>2  |
|             | 1415.7<br>7 | 1465.2       | 1413.9<br>9  | 1417.8<br>4  | 1187.7<br>7  | 1314.9<br>5  | 1418.5<br>1  |
|             | 1426.2<br>5 | 1472.4<br>2  | 1455.7<br>8  | 1424.4<br>3  | 1416.4<br>8  | 1414.7<br>6  | 1546.0<br>3  |
|             | 1767.5<br>6 | 1475.7<br>7  | 1462.8       | 1589.5<br>4  | 1470.1<br>3  | 1497.8<br>8  | 1861.8<br>8  |
|             | 2458.2<br>1 | 2465.0<br>6  | 2461.4<br>6  | 2461.4<br>9  | 2023.0<br>3  | 2459.9       | 2467.1<br>6  |
|             | 3114.8<br>5 | 3055.3<br>5  | 3156.5<br>2  | 3126.3       | 2464.5<br>9  | 3134.3<br>6  | 2989.4<br>2  |
|             | 3292.3<br>7 | 3160.2<br>7  | 3301.5<br>1  | 3297.3<br>5  | 3086.3<br>7  | 3272.1<br>5  | 3079.7<br>6  |
|             | 3312.7<br>9 | 3176.6<br>7  | 3788.2<br>2  | 3318.4<br>5  | 3216.3<br>1  | 3814.9<br>1  | 3752.0<br>9  |
| D1          | 3.7352<br>7 | 6.6719<br>5  | 5.7989<br>8  | 5.1627<br>8  | 6.3406<br>8  | 5.7516<br>5  | 4.1924<br>5  |
| 2D1         | 2.1894<br>1 | 1.9743       | 2.4165<br>4  | 1.9017<br>9  | 2.4227<br>3  | 2.0911<br>9  | 1.9853<br>6  |
| 2D2         | 1.8719      | 1.5383<br>5  | 1.8835<br>1  | 1.4514       | 2.0182<br>9  | 1.5780<br>1  | 1.3660<br>3  |
| 2D          | 2.0244<br>4 | 1.7427<br>46 | 2.1334<br>43 | 1.6614<br>02 | 2.2112<br>83 | 1.8165<br>68 | 1.6468<br>34 |
| with<br>H2O |             |              |              |              |              |              |              |
| RC-h        | Int-1-h     | Int-2-h      | TS1-h        | TS2-h        | TS3-h        | PC-h         | TS1-ah       |
| 33.92       | 114.43      | 124.97       | -227.12      | -1839.1      | -691.5       | 56.71        | -278.56      |
| 59.76       | 132.05      | 162.9        | 48.36        | 156.55       | 31.87        | 75.33        | 63.95        |
| 73.21       | 166.51      | 205.83       | 66.06        | 198.82       | 138.93       | 170.76       | 97.58        |
| 109.86      | 178.3       | 249.08       | 88.52        | 216.08       | 191.97       | 224.59       | 120.29       |
| 134.85      | 203.37      | 303.05       | 146.96       | 220.5        | 220.82       | 248.06       | 140.16       |
| 164.89      | 382.37      | 346.5        | 178.02       | 342.15       | 247.57       | 249.89       | 182.43       |
| 175.12      | 489.12      | 507.03       | 199.25       | 359.32       | 386.1        | 262.18       | 218.12       |
| 184.83      | 536.05      | 535.51       | 240.38       | 501.38       | 459.18       | 412.52       | 234.3        |
| 226.4       | 965.85      | 737.68       | 270.79       | 775.2        | 504.84       | 508.03       | 283.32       |
| 258.87      | 1139.77     | 762.49       | 412.13       | 909.39       | 601.01       | 638.97       | 481.41       |
| 268.31      | 1206.89     | 969.48       | 480.23       | 1051.29      | 722.12       | 807.99       | 499.02       |
| 504.29      | 1337.45     | 1201.04      | 768.86       | 1120.01      | 1183.16      | 1245.2       | 807.96       |
| 1405.35     | 1462.73     | 1256.09      | 1416.21      | 1143.6       | 1233.84      | 1292.85      | 1417.94      |
| 1416.58     | 1474.34     | 1457.36      | 1421.91      | 1192.91      | 1361.56      | 1552.15      | 1421.39      |
| 1634.52     | 1480.23     | 1532.87      | 1598.78      | 1460.92      | 1499.37      | 1641.2       | 1583.59      |
| 1748.11     | 1636.03     | 1631.89      | 1644.11      | 1655.85      | 1623.61      | 1844.98      | 1626.49      |
| 3113.78     | 3052.37     | 3141.51      | 3119.56      | 2017.39      | 3105.54      | 2993.4       | 3130.46      |
| 3293.15     | 3163.39     | 3283.58      | 3300.78      | 3094.13      | 3241.9       | 3099.79      | 3306.55      |
| 3306.85     | 3172.02     | 3579.23      | 3312.63      | 3228.06      | 3690.38      | 3481.74      | 3316.6       |
| 3899.57     | 3787.86     | 3817.19      | 3896.65      | 3869.68      | 3859.92      | 3682.82      | 3885.76      |
| 3997.12     | 3961.99     | 3948.9       | 3988.122     | 3955.5       | 3971.45      | 3966.72      | 3985.35      |
| 18.10487    | 11.34254    | 10.20971     | 17.97533     | 11.00459     | 13.22988     | 6.98875      | 7.81707      |
| 1.82558     | 4.08591     | 4.60744      | 2.1712       | 4.45225      | 3.54628      | 3.32137      | 3.27206      |

|          |          |          |          |          |          |          |          |
|----------|----------|----------|----------|----------|----------|----------|----------|
| 1.68733  | 3.06194  | 3.57528  | 1.96377  | 3.79697  | 3.00099  | 2.26552  | 2.43621  |
| 1.755094 | 3.537063 | 4.058681 | 2.064882 | 4.111576 | 3.262262 | 2.743106 | 2.823371 |

**Table S3.** Calculated equilibrium constants ( $K_{eq}$  in  $\text{cm}^3 \text{ molecule}^{-1}$ ) for the formation of two-body and three body complexes.

| Temp | RC       | Ke-1-c   | Ke-2-c   | Ke-1-h   | Ke-2h    |
|------|----------|----------|----------|----------|----------|
| 500  | 8.48E-16 | 9.11E-25 | 2.85E-27 | 2.07E-26 | 7.11E-23 |
| 600  | 5.09E-18 | 9.88E-25 | 3.02E-27 | 2.33E-26 | 5.29E-23 |
| 700  | 1.34E-19 | 1.11E-24 | 3.37E-27 | 2.68E-26 | 4.59E-23 |
| 800  | 8.95E-21 | 1.27E-24 | 3.86E-27 | 3.10E-26 | 4.35E-23 |
| 900  | 1.11E-21 | 1.46E-24 | 4.47E-27 | 3.60E-26 | 4.35E-23 |
| 1000 | 2.13E-22 | 1.68E-24 | 5.19E-27 | 4.16E-26 | 4.50E-23 |
| 1100 | 5.60E-23 | 1.92E-24 | 6.03E-27 | 4.79E-26 | 4.75E-23 |
| 1200 | 1.87E-23 | 2.19E-24 | 6.98E-27 | 5.49E-26 | 5.09E-23 |
| 1300 | 7.48E-24 | 2.49E-24 | 8.06E-27 | 6.25E-26 | 5.49E-23 |
| 1400 | 3.45E-24 | 2.82E-24 | 9.26E-27 | 7.09E-26 | 5.97E-23 |
| 1500 | 1.78E-24 | 3.18E-24 | 1.06E-26 | 8.00E-26 | 6.50E-23 |

### Details of chemical kinetics analysis

For pressure-dependent reactions, Rice–Ramsperger–Kassel–Marcus (RRKM)/master equation (ME) was used and the energy-dependent specific unimolecular rate constants  $k_i(E, J)$  is given by [39]

$$k(E) = L^\ddagger \frac{1}{h} \frac{G^\ddagger(E - E_0)}{\rho(E)} \quad (\text{S1})$$

where  $L^\ddagger = \frac{m^\ddagger}{m} \times \frac{\sigma_{ext}}{\sigma_{ext}^\ddagger}$  is the reaction path degeneracy;  $\sigma_{ext}^\ddagger$  and  $\sigma_{ext}$  are the ex-

ternal rotation symmetry numbers of the transition state and reactant;  $m^\ddagger$  and  $m$  are the numbers of optical isomers (mirror image) of the transition state and reactant, respectively,  $h$  is Planck's constant;  $G^\ddagger(E - E_0)$  is the sum-of-states of the transition state;  $E_0$  is the reaction threshold energy, and  $\rho(E)$  is the density of states of the reactant molecule. The sums and densities of states were computed using DenSum as implemented in MultiWell Program. The internal energy  $E$  is measured relative to the zero point energy of the reactant molecule and the reaction threshold energy (critical energy) is the difference between the zero point energies of reactant and transition state. The pressure-dependent rate constants were simulated using estimated energy transfer parameters for the intermediates. The tunnelling corrections were implemented based on asymmetric Eckart potential. The approximated temperature-dependent exponential down  $\langle \Delta E \rangle_{\text{down}} = 200 \cdot (T/300)^{0.85} \text{ cm}^{-1}$  [28,32] was used to calculate the rate constants. The Lennard-Jones parameters for collider gases ( $\text{N}_2$ )  $\epsilon/\text{kJ}$ ,  $\sigma(\text{N}_2) = 3.74 \text{ \AA}$ ,  $\epsilon/\text{kJ}(\text{N}_2) = 82 \text{ K}$  were used in our calculation based on previous studies.[28,32] The bimolecular rate constant describing collisions between  $\text{N}_2$  and the complex, intermediate ("Well") was based on Lennard-Jones collisions with net parameters obtained using the usual combining rules from parameters for the two collision partners:  $\text{N}_2$  gas ( $\sigma = 3.74 \text{ \AA}$  and  $\epsilon/\text{kJ} = 82 \text{ K}$ ) [52] and the Well ( $\sigma = 5.20 \text{ \AA}$  and  $\epsilon/\text{kJ} = 212 \text{ K}$ , used for all Wells). The double arrays used in MultiWell for the master equation simulations consisted of 5000 array elements with  $10 \text{ cm}^{-1}$  energy grains, with the quasi-continuum regime evaluated up to  $50000 \text{ cm}^{-1}$ . At each temperature and pressure, master equation simulations were initiated using the chemical activation energy distribution, which is appropriate for recombination reactions.

---

The calculated rate constants in the high-pressure limit ( $k_{\infty}$ ) were fit to the modified Arrhenius expression  $k_{\infty}^{bimol}(T) = A \times T^n \left( \exp - \left( \frac{E_a}{RT} \right) \right)$  in the temperature range of 500 – 1500 K.
